# Supplementary material
Source: PubMed Central journal article supplement (PMC4237209)
Supplement: NIHMS627475-supplement-2.pdf [file NIHMS627475-supplement-2.pdf]

## Supplemental Information Inventory

1. Supplemental Experimental Procedure related to Experimental Procedure
2. Supplemental Figure Legends
3. Supplemental Table S1  
“Summary of mean Delta values measured for separation between CCAN proteins labels and Ndc80/Hec1(9G3) at metaphase.”
4. Supplemental Figure S1 related to Figure 1  
“Delta analysis for control metaphase cells of the separation between the various CCAN proteins labels and Ndc80/Hec1(9G3).”
5. Supplemental Figure S2 related to Figure 2  
“CCAN proteins localize at peripheral surface of centromeric chromatin containing CENP-A at metaphase.”
6. Supplemental Figure S3 related to Figure 2  
“The mean centroid position of CENP-C locates deeper within the inner centromere depending on amount of expression.”
7. Supplemental Figure S4 related to Figure 3  
“The stretch of the Ndc80 complex does is not affected by depletion of CCAN complex for bi-oriented chromosomes in late prometaphase.
8. Supplemental Figure S5 related to Figure 5  
“Criteria used to select kinetochores for Delta analysis based on compaction of CENP-A chromatin.”
9. Supplemental Figure S6 related to Figure 6  
“Hyper intra-kinetochore stretch reduces both the level of phosphorylation of the Knl1 and the level of Mad1 in late prometaphase.”

## **Supplemental Experimental Procedure**

### **Transfection for RNAi and plasmid**

RNAi experiments were conducted using LipofectamineRNAi MAX (Invitrogen) using the manufacturer's instructions. siRNA transfections were performed with a total of 100 nM of siRNA duplex and siRNA sequences of CENP-T, CENP-C, CENP-Q, and CENP-H described previously (Gascoigne et al., 2011; Okada et al., 2006). Transient transfection of cells with plasmids or establishment of stable cell encoding GFP fusion proteins: GFP-CENP-N, CENP-N-GFP, CENP-R-GFP, GFP-CENP-H, CENP-H-GFP, GFP-CENP-M, CENP-M-GFP, GFP-CENP-K, CENP-K-GFP, CENP-O-GFP, GFP-CENP-P, CENP-P-GFP, GFP-CENP-C426 (426-943 aa), GFP-CENP-C690 (690-943 aa), GFP-CENP-C759 (759-943 aa), GFP-CENP-T107 (107-561 aa), GFP-CENP-T, CENP-T-GFP. GFP-CENP-C, and CENP-C-GFP were performed with transfection reagent (Effectene; QIAGEN) according to the manufacturer's instructions. We analyzed only cells expressing lower levels of GFP fusion proteins. For stable cell lines, we added Neomycin (Gibco) after transfection and selected cell lines by Western blot expressing similar levels as endogenous proteins. For all CENP-T and CENP-C GFP fusion protein constructs, we used an RNAi-resistance sequence. cDNA of CENP-R, CENP-N, CENP-H, CENP-C and CENP-T were a gift from Dr. IM Cheeseman (Whitehead Institute, MIT, USA). GFP fusion to CENP-C or CENP-T rescued the depletion of endogenous protein by siRNA by several criteria. The depletion of CENP-C or CENP-T induced around 60% reduction of Ndc80/Hec1, but GFP-fusion proteins recovered control level of Ndc80 recruitment to the kinetochore. In addition, the mean separation between CENP-A and Ndc80/Hec1(9G3) increased in CENP-C or CENP-T depletion (Figure 3A), and this

phenotype was also rescued by GFP-fusion protein (Figure 2A and Figure S3C-D).

## Immunofluorescence Labeling

### Sources of Primary Antibodies and Their Antigens

| Antibody                 | Antigen        | Source          | Reference              |
|--------------------------|----------------|-----------------|------------------------|
| Rabbit anti-CENP-A       | Full length    | Aaron Straight  | Wan et al., 2009       |
| Rabbit anti-Spc24        | Full length    | Todd Stukenberg | Varma et al., 2013     |
| Rabbit anti-CENP-I       | N-term 249     | Tim Yen         | Liu et al., 2003       |
| Rabbit anti-CENP-C       | Full length    | Iain Cheeseman  | Gascoigne et al., 2011 |
| Rabbit anti-CENP-T       | Full length    | Iain Cheeseman  | Gascoigne et al., 2011 |
| Mouse anti-Hec1 (9G3)    | 200-222        | Abcam           | Wan et al., 2009       |
| Rabbit anti-CENP-Q       | Full length    | Abcam           | This paper             |
| Rabbit anti-CENP-H       | 1-50           | Bethyl          | This paper             |
| Rabbit anti-CENP-K       | Full length    | MBL             | This paper             |
| Rabbit anti-CENP-50/U    | Full length    | MBL             | This paper             |
| Rabbit anti-GFP          | GFP            | Invitrogen      | This paper             |
| Mouse anti-GFP           | GFP            | Abcam           | This paper             |
| Rabbit anti-Ser44-P      | Ser44-P (Hec1) | Jennifer DeLuca | DeLuca et al., 2011    |
| Rabbit anti-Ser55-P      | Ser55-P (Hec1) | Jennifer DeLuca | DeLuca et al., 2011    |
| Rabbit anti-CENP-I       | 700-756        | Abcam           | This paper             |
| Rabbit anti-phospho Knl1 | Ser 24-P       | Iain Cheeseman  | Welburn et al., 2010   |

## Imaging

For image acquisition, 50 frame 3D stacks of pairs of red and green fluorescent images were obtained sequentially at 200 nm steps along the z axis through the cell using MetaMorph 6.1 software (Molecular Devices) and a high-resolution Nikon TE300 inverted microscope equipped with a Yokogawa CSU10 spinning disk confocal with image magnification yielding a 65 nm pixel size from the Orca ER cooled CCD camera (Wan et al., 2009) and an 100X/1.4NA (Planapo) DIC oil immersion objective (Nikon).

## Fluorescence Intensity Measurement

The Z-axis position of best focus (maximum integrated intensity) was used for

analysis of kinetochore fluorescence. A 9 x 9 pixel region was centered on the fluorescent kinetochore spot to obtain integrated fluorescence, while a 11x11 pixel region centered on the 9 x 9 pixel region was used to obtain surrounding BG intensity.  $F_i$  (integrated kinetochore fluorescence minus BG) = integrated intensity for 9 x 9 region – (integrated counts for the 11 x 11 region – integrated counts for 9 x 9 region) x pixel area of the 9 x 9 region / (pixel area of the 11 x 11 region – pixel area of a 9 x 9 region) as described previously (Lawrimore et al., 2011). Measurements were made with Metamorph 7.7 analysis software (Molecular Devices) using the region measurements tool. For analysis of phospho-Hec1 (Ser44-P or Ser55-P) or kMT intensities, we normalized  $F_i$  of the phospho-Hec1 (Ser44-P or Ser55-P) or kMT by  $F_i$  of Ndc80/Hec1(9G3) intensities (total Hec1) from same kinetochore in a different fluorescent color.

## Supplementary Figure legends

Supplementary Figure S1 (Related to Figure 1)

Delta analysis for control metaphase cells of the separation between the following CCAN proteins labels and Ndc80/Hec1(9G3) listed above each Delta plot (A-L).

Supplementary Figure S2 (Related to Figure 2)

CCAN proteins localize at peripheral surface of centromeric chromatin containing CENP-A at metaphase. (A-D) Two-color immunofluorescence (left) and Delta analysis (right) for the pairs of protein labels listed above each low magnification immunofluorescence image. Note, antibodies were used to label GFP. Mean Delta values are given on each plot and n = number of sister pairs measured.

Supplementary Figure S3 (Related to Figure 2)

The mean centroid position of CENP-C locates deeper within the inner centromere depending on amount of expression. (A) The schematic representation of human CENP-C. The color boxes indicate Central DNA binding domain (426-537) and the two Mif2 DNA binding domains (736-758 and 846-843). CC426 removes N-terminus region of CENP-C. CC690 removes N-terminus region and Central domain. CC759 removes N-terminus region, Central domain, and one of the Mif2 domains. (B) Two-color immunofluorescence using Ndc80/Hec1(9G3) and GFP antibodies for cells expressing GFP-CC426, GFP-CC690, and GFP-CC759. (C) Summary of kinetochore localization of CENP-C mutants. (D) Two-color immunofluorescence using CENP-A and GFP antibodies for cells with low (upper) and high (lower) expression of GFP-CC426. (E) The dependence between the mean separations of GFP-CC426 from

CENP-A at metaphase as a function of the expression level of GFP-CC426 measured by the integrated fluorescence intensity of immunofluorescently labeled GFP-CC426. (F) Two-color immunofluorescence using tubulin and GFP antibodies for cells with low (upper) and high (middle and lower) expression of GFP-CC426. (G) The DAPI images 48 hours after transfection of control (left) and GFP-CC426 (right).

#### Supplementary Figure S4 (Related to Figure 3)

The stretch of the Ndc80 complex does is not affected by depletion of CCAN complex for bi-oriented chromosomes in late prometaphase. (A) CENP-A is over incorporated at metaphase centromeres in the HeLa cell line stability expressing GFP-CENP-A that was used in the previous Delta analysis by Wan et al., 2009. Two-color immunofluorescence using CENP-A and GFP antibodies in control or GFP-CENP-A cells (left). Integrated fluorescence intensity at kinetochores normalized by the mean level measured for control cells (right). (B) Immunofluorescence images showing changes in kinetochore concentration of CCAN proteins relative to Ndc80/Hec1(9G3) and control cells for the proteins and RNAi indicated: CENP-Q, Ndc80/Hec1(9G3), and CENP-C in control cells or CENP-Q depleted cells (top, left); CENP-T, Ndc80/Hec1(9G3), and CENP-C in control cells or CENP-C depleted cells (top, middle); CENP-T, Ndc80/Hec1(9G3) and CENP-C in control cells or CENP-T depleted cells (bottom, left); CENP-H, Ndc80/Hec1(9G3), and CENP-C in control cells or CENP-H depleted cells (bottom, middle); and CENP-H, Ndc8/Hec1(9G3) and CENP-C in control cells or CENP-C/CENP-H depleted cells (top, right). Measurement of Ndc80/Hec(9G3) and CCAN protein intensities normalized to their values in control cells for the RNAi treated cells (bottom, right). (C) Kinetochore immunofluorescence of both Spc24 and Ndc80/Hec1(9G3) in control cells, CENP-Q

RNAi cells, CENP-C RNAi cells, CENP-T RNAi cells, CENP-H RNAi cells or CENP-C/CENP-H RNAi cells (upper). Corresponding Delta analysis (lower). (D) The mean separation between Spc24 and Ndc80/Hec1(9G3) does not change between experimental and control cells in (C).

#### Supplementary Figure S5 (Related to Figure 5)

Criteria used to select kinetochores for Delta analysis based on compaction of CENP-A chromatin. Delta analysis was performed for kinetochores exhibiting CENP-A fluorescence where the thickness of the kinetochores along the kMT or K-K axis appeared less than or equal the width of the face of the kinetochore. For the quantification of the percentage of kinetochores with de-compacted CENP-A chromatin, line scans were obtained along the kMT axis through the central width of the kinetochores and perpendicular along the face of the kinetochore, and CENP-A chromatin was identified as de-compacted when the full width at half-maximal intensity along the kMT or K-K axis was greater than for the face of the kinetochore.

#### Supplementary Figure S6 (Related to Figure 6)

Hyper intra-kinetochore stretch is associated with a reduction in both the level of phosphorylation of Knl1 and the level of kinetochore Mad1 in late prometaphase. (A) Two-color immunofluorescence for Ndc80/Hec1(9G3) and phospho-Knl1 at kinetochores in control cells, CENP-C, or CENP-T depleted cells. (B) Integrated fluorescence intensity of phospho-Knl1 for bi-oriented (left) or not bi-oriented (right) kinetochores in control, CENP-C, or CENP-T depleted cells. (C) Two-color immunofluorescence for Ndc80/Hec1(9G3) and tubulin at kinetochores in control cells, CENP-C, or CENP-T depleted cells with cold treatment. (D) Integrated

fluorescence intensity of kMT at kinetochores normalized by the value for Ndc80/Hec1(9G3) on bi-oriented kinetochores in control, CENP-C, or CENP-T depleted cells. (E) Integrated fluorescence intensity of Mad1 at bi-oriented (left) or not bi-oriented (right) kinetochores in control late prometaphase, CENP-C, CENP-T, CENP-C/-H depleted cells. (Student' t-test \*  $p < 0.10$ , \*\*  $p < 0.05$ )



|                            | Distance (nm $\pm$ S.D.) | N number | K-K Distance (nm $\pm$ S.D.) |
|----------------------------|--------------------------|----------|------------------------------|
| CENP-50 (U)-Hec1 (9G3)     | 48.4 $\pm$ 8.6           | n = 145  | 1265.3 $\pm$ 238.7           |
| CENP-A-Hec1 (9G3)          | 84.5 $\pm$ 7.7           | n = 127  | 1129.9 $\pm$ 209.7           |
| CENP-H-Hec1 (9G3)          | 51.8 $\pm$ 6.5           | n = 179  | 1516.8 $\pm$ 350.7           |
| GFP-CENP-H-Hec1 (9G3)      | 54.7 $\pm$ 5.0           | n = 103  | 1194.2 $\pm$ 209.9           |
| CENP-H-GFP-Hec1 (9G3)      | 55.9 $\pm$ 8.2           | n = 101  | 1444.2 $\pm$ 281.6           |
| CENP-I-Hec1 (9G3)          | 58.6 $\pm$ 5.4           | n = 105  | 1194.7 $\pm$ 197.7           |
| CENP-I (C-term)-Hec1 (9G3) | 41.4 $\pm$ 10.3          | n = 204  | 1202.6 $\pm$ 179.3           |
| CENP-K-Hec1 (9G3)          | 55.9 $\pm$ 7.0           | n = 183  | 1196.1 $\pm$ 221.3           |
| GFP-CENP-K-Hec1 (9G3)      | 63.3 $\pm$ 6.3           | n = 84   | 1210.3 $\pm$ 223.5           |
| GFP-CENP-N-CENP-A          | 22.6 $\pm$ 6.0           | n = 107  | 1171.8 $\pm$ 214.2           |
| CENP-K-GFP-Hec1 (9G3)      | 67.7 $\pm$ 8.2           | n = 90   | 1522.2 $\pm$ 303.1           |
| GFP-CENP-L-Hec1 (9G3)      | 64.2 $\pm$ 5.8           | n = 103  | 1390.9 $\pm$ 336.2           |
| CENP-L-GFP-Hec1 (9G3)      | 63.0 $\pm$ 9.0           | n = 85   | 1354.1 $\pm$ 196.5           |
| GFP-CENP-M-Hec1 (9G3)      | 59.9 $\pm$ 6.9           | n = 96   | 1595.0 $\pm$ 378.1           |
| CENP-M-GFP-Hec1 (9G3)      | 62.3 $\pm$ 7.5           | n = 96   | 1314.7 $\pm$ 311.6           |
| CENP-O-GFP-Hec1 (9G3)      | 66.0 $\pm$ 5.3           | n = 93   | 1353.0 $\pm$ 256.1           |
| GFP-CENP-P-Hec1 (9G3)      | 63.4 $\pm$ 7.0           | n = 96   | 1500.8 $\pm$ 365.6           |
| CENP-P-GFP-Hec1 (9G3)      | 65.6 $\pm$ 6.2           | n = 96   | 1392.0 $\pm$ 246.2           |
| CENP-Q-Hec1 (9G3)          | 63.4 $\pm$ 6.8           | n = 110  | 1250.3 $\pm$ 220.7           |
| CENP-R-GFP-Hec1 (9G3)      | 64.5 $\pm$ 5.9           | n = 104  | 1339.1 $\pm$ 203.6           |
| CENP-T (M)-Hec1 (9G3)      | 60.0 $\pm$ 5.8           | n = 89   | 1234.3 $\pm$ 169.7           |
| CENP-C (M1)-Hec1 (9G3)     | 60.6 $\pm$ 5.8           | n = 66   | 1329.8 $\pm$ 265.3           |
| CENP-C (M2)-Hec1 (9G3)     | 62.5 $\pm$ 4.6           | n = 62   | 1365.8 $\pm$ 276.3           |

Table S1 (Related to Figure 1)

Summary of mean Delta values measured for separation between CCAN proteins labels and Ndc80/Hec1(9G3) at metaphase. Included are the number of kinetochore pairs analyzed (n), and mean sister kinetochore K-K separation of Hec1(9G3) labels for metaphase sister kinetochore pairs. Positive values are inward (towards the centromeric chromatin).

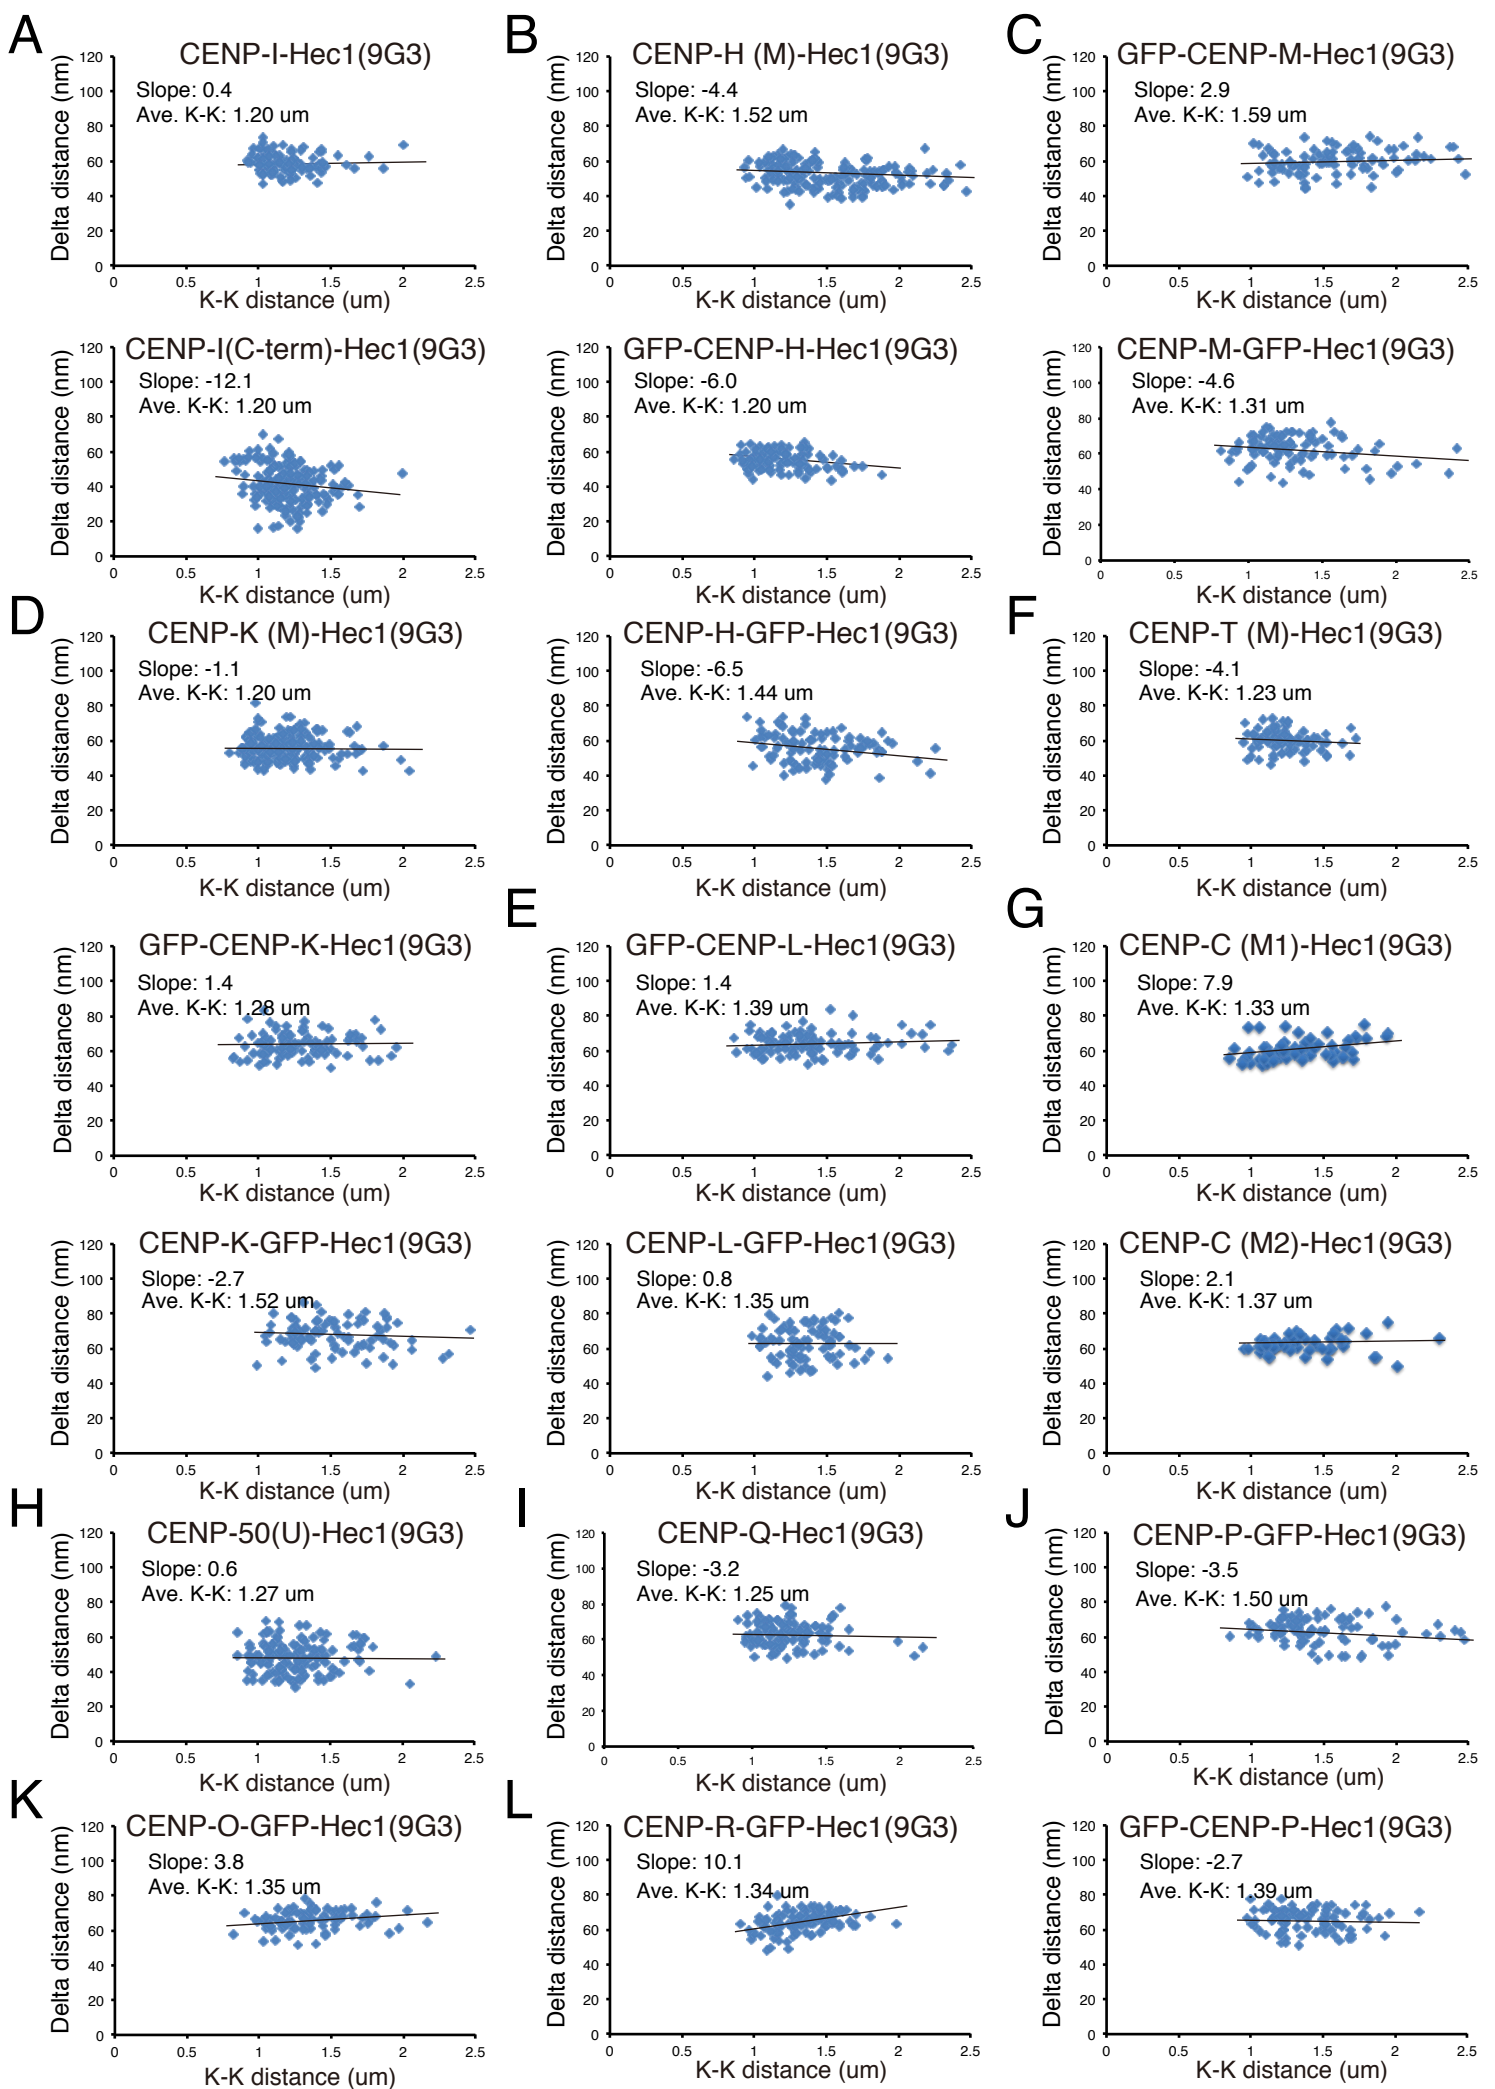

Figure S1

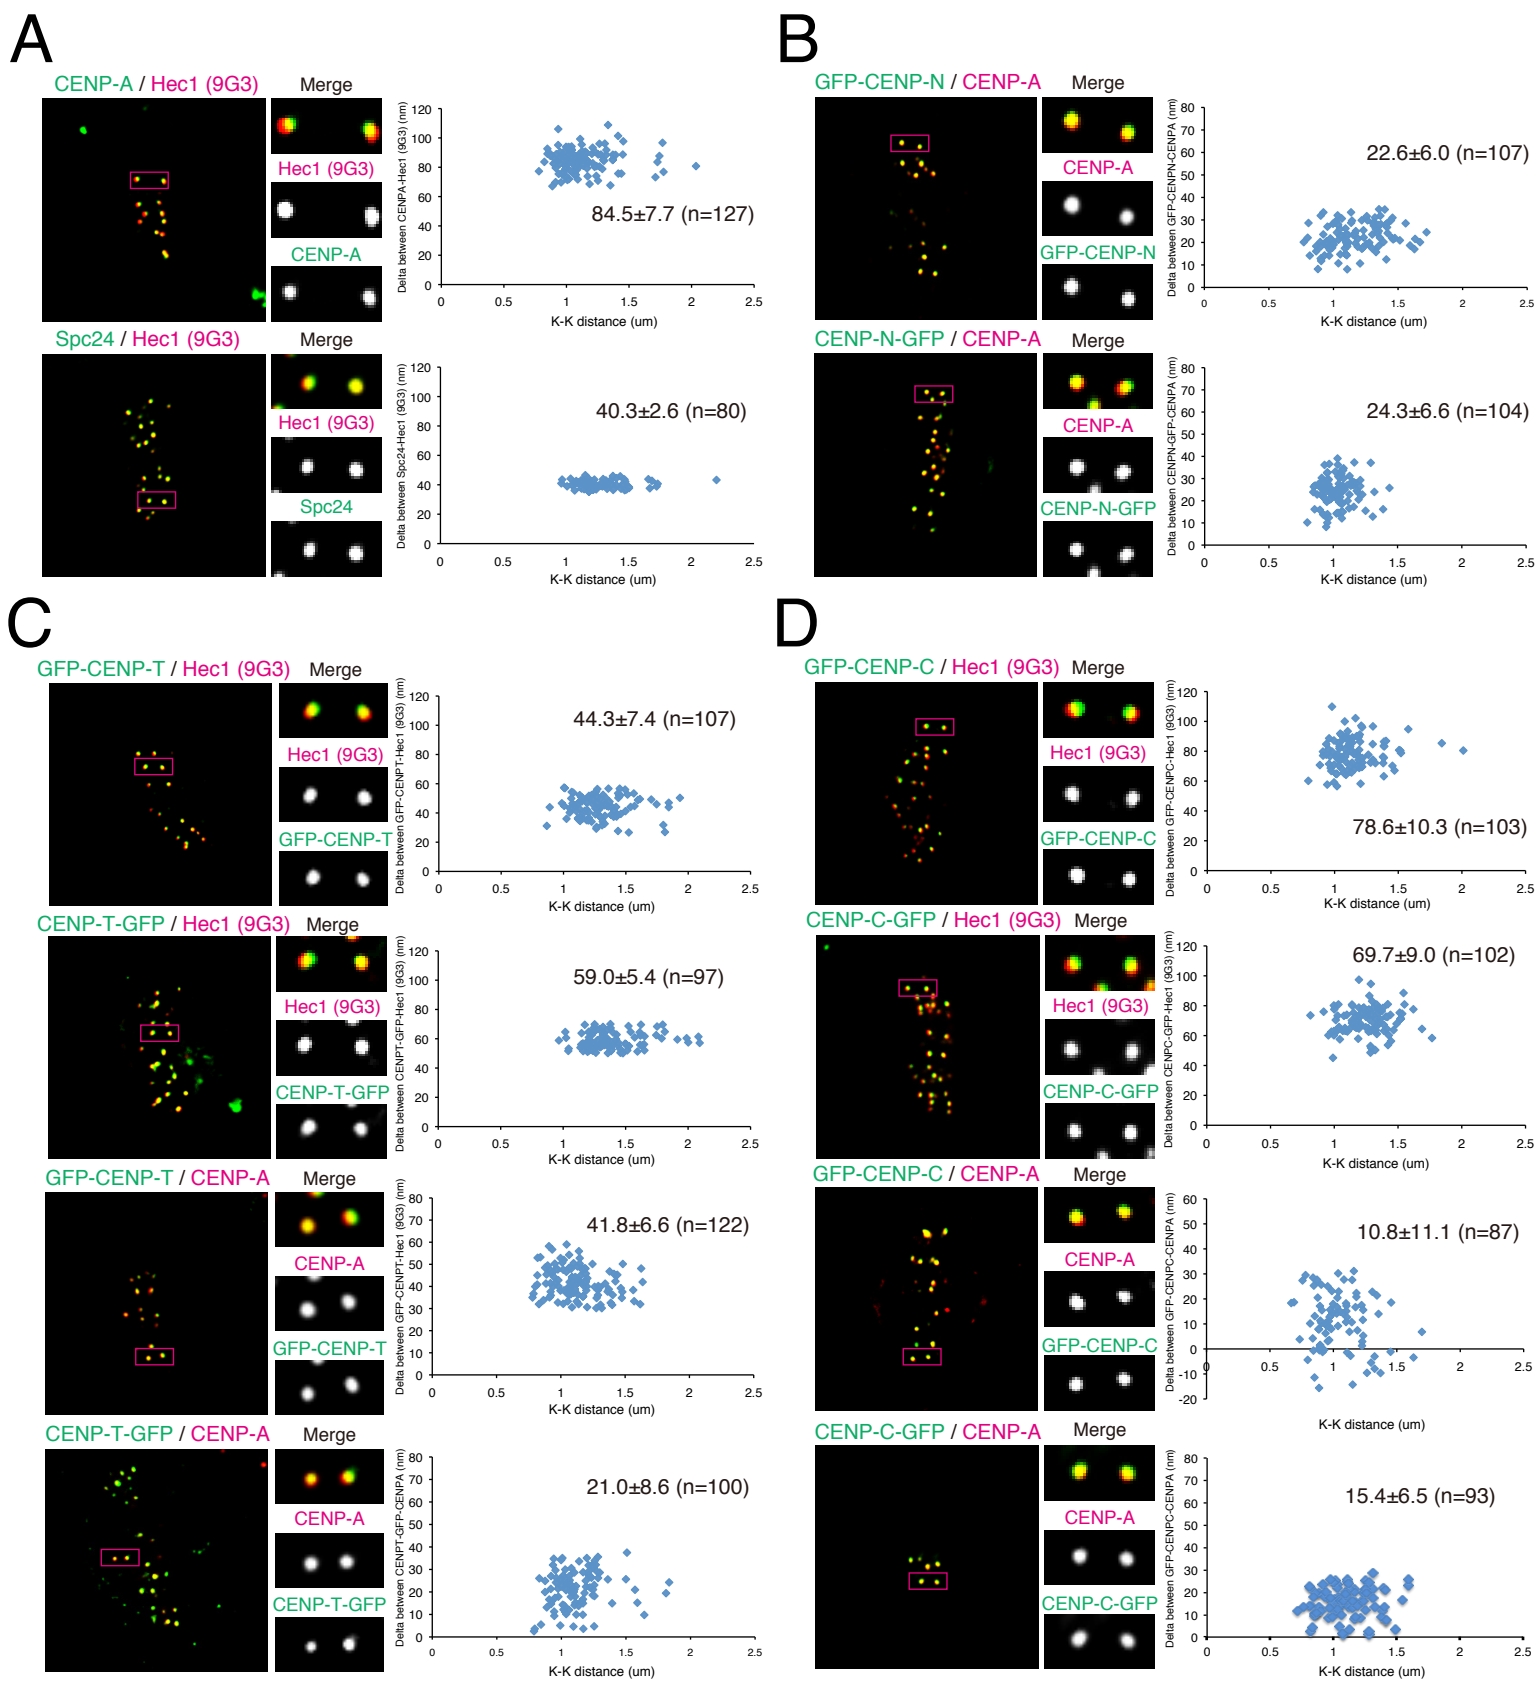

Figure S2

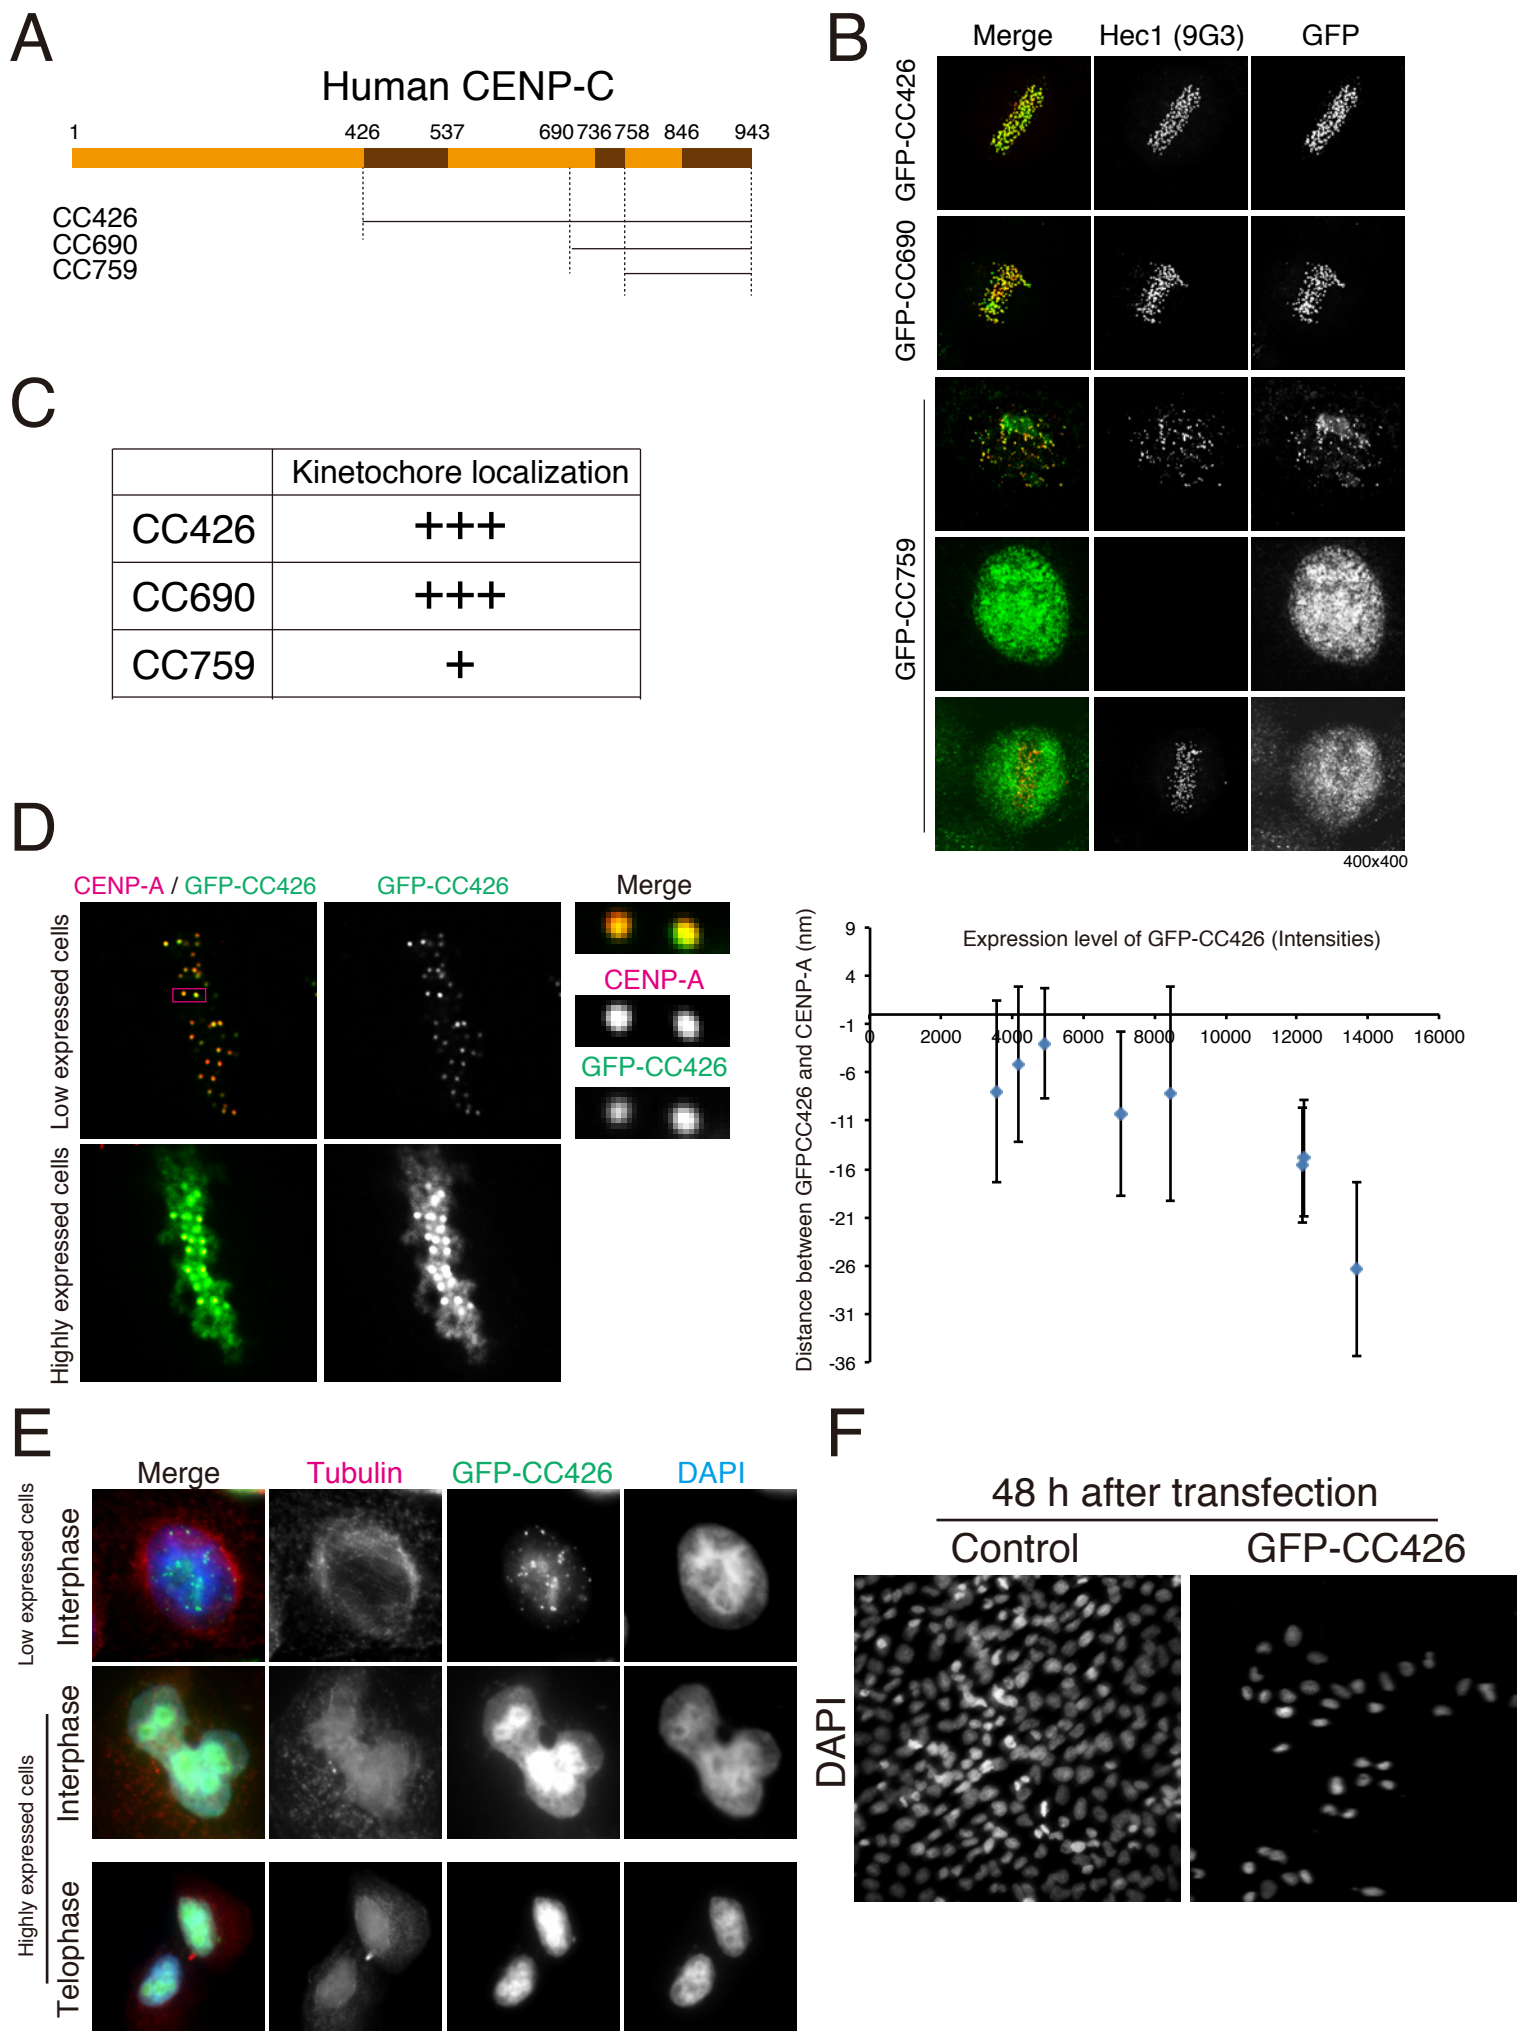

Figure S3

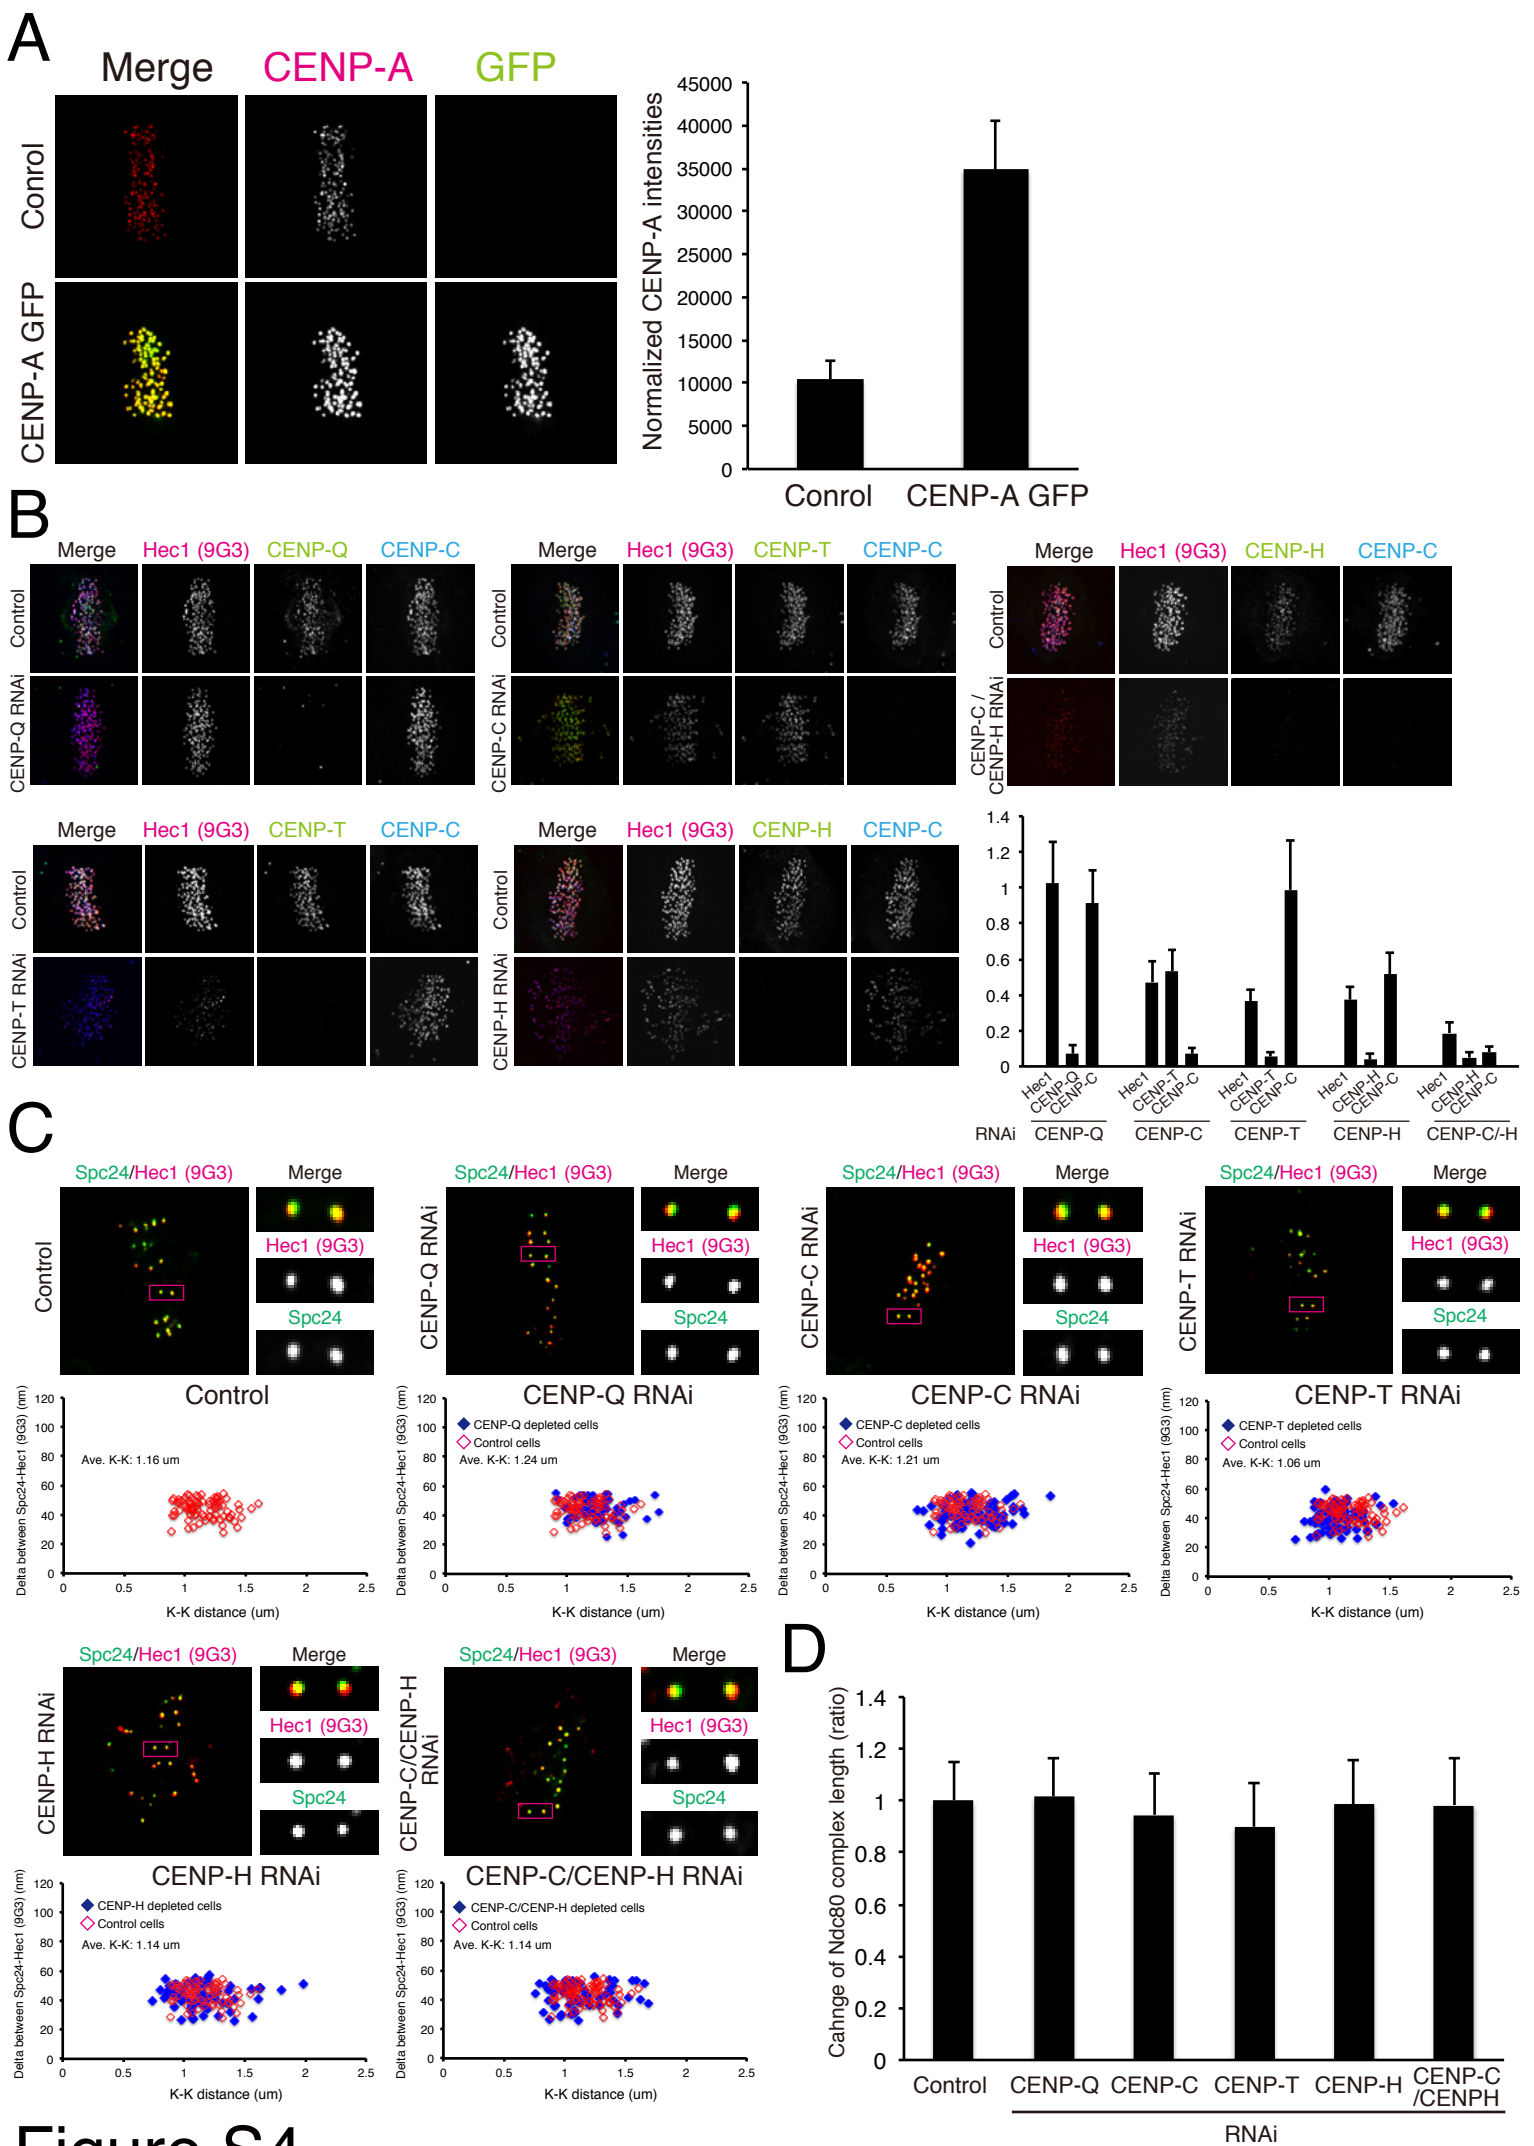

Figure S4

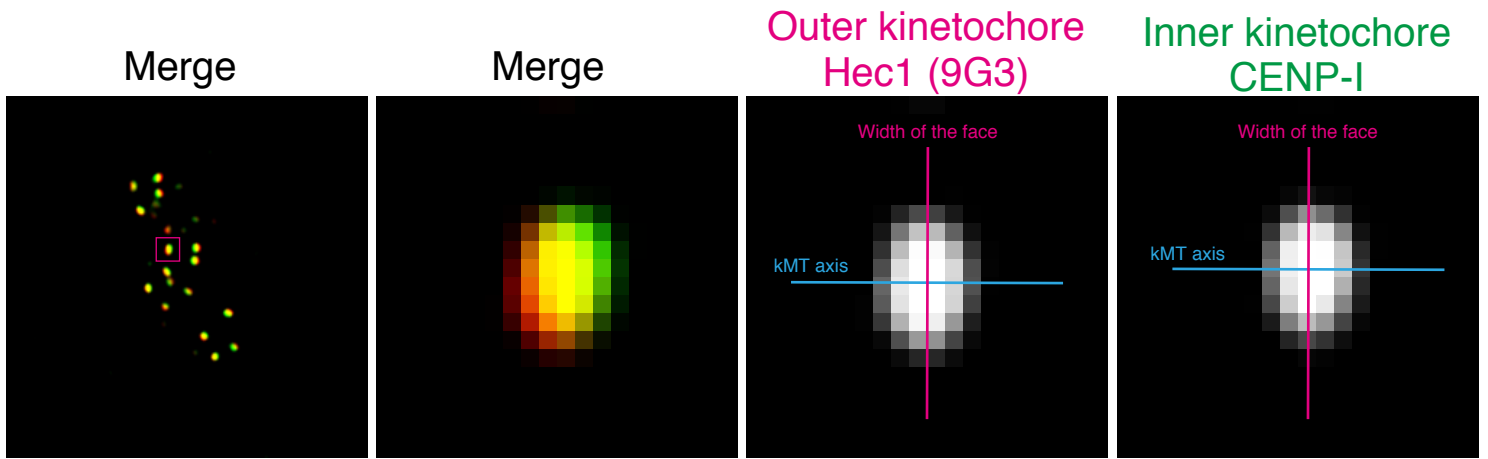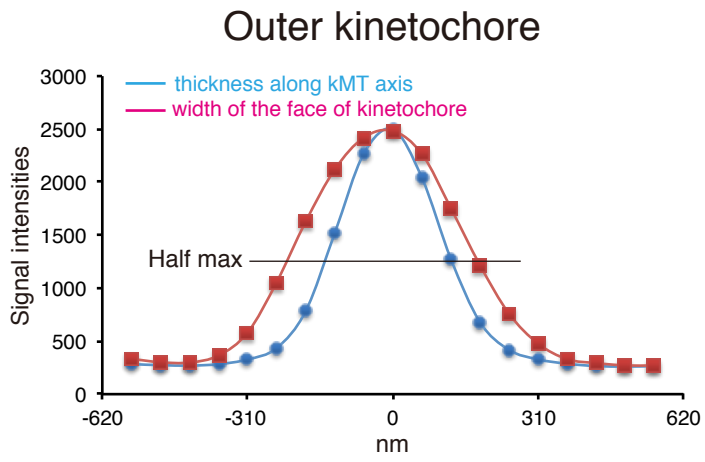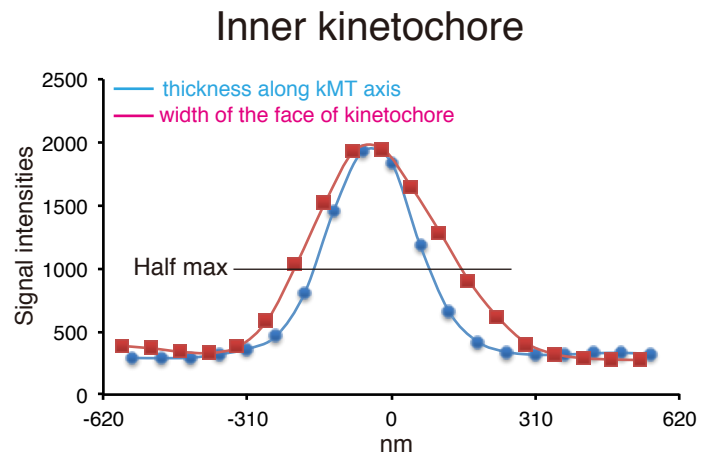

Figure S5

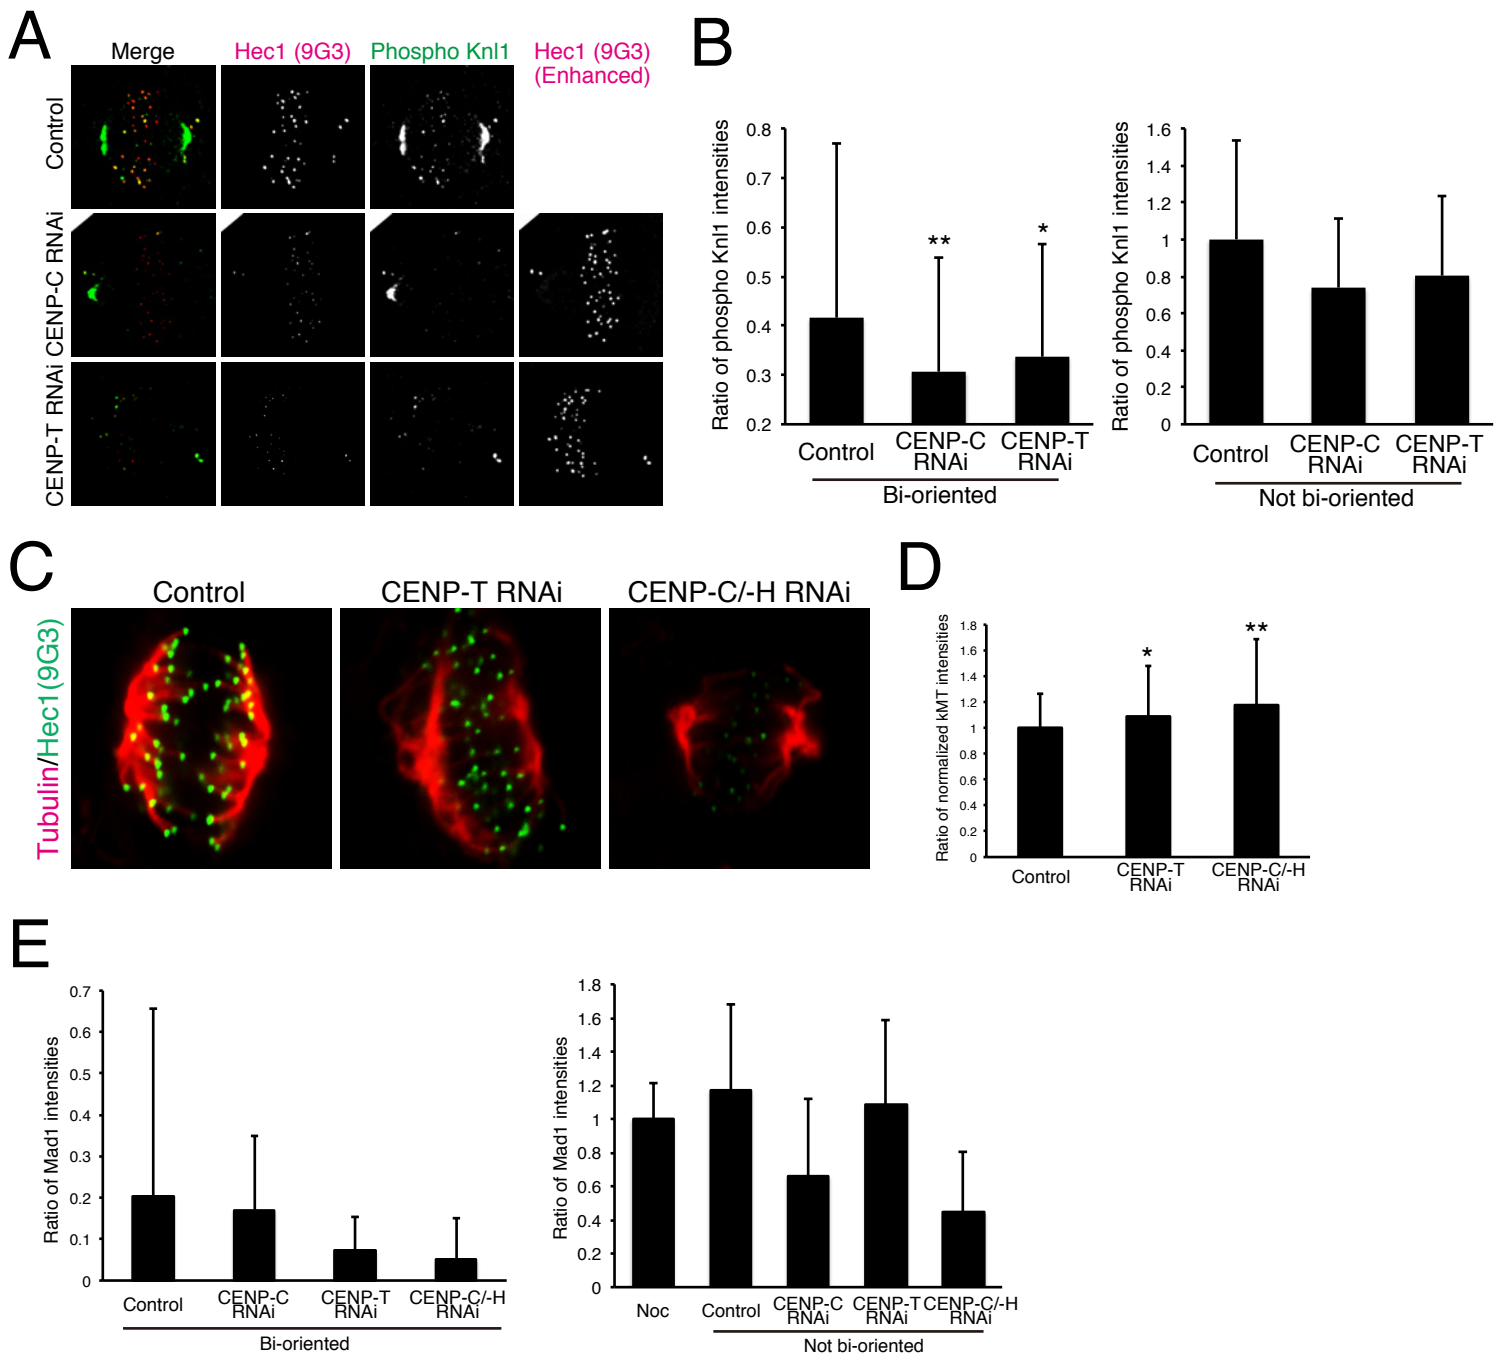

Figure S6
